# Supplementary material
Source: publisher site journal article supplement (https://static.cambridge.org/content/id/urn:cambridge.org:id:article:S003382222000123X/resource/name/S003382222000123Xsupp002.pdf)

Sequence

Boundary Trilith Activity Start

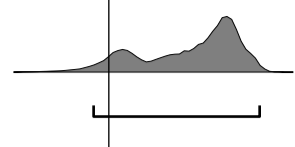

Phase Trilith Activity

R\_Date CRL19003

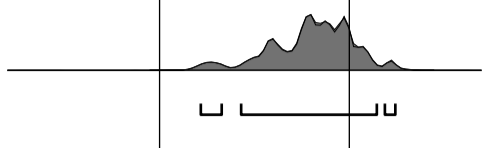

R\_Date CRL19004

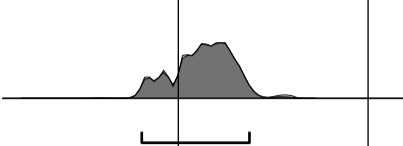

R\_Date CRL19098

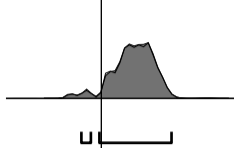

R\_Date CRL19099

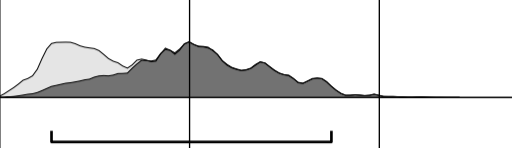

R\_Date CRL19207

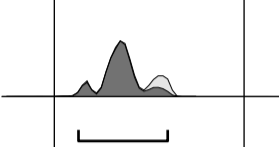

R\_Date CRL19209

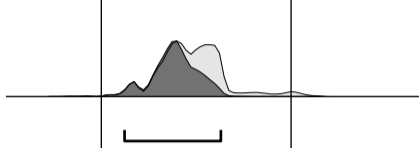

R\_Date CRL19210

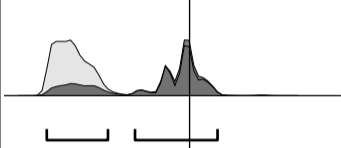

R\_Date CRL19211

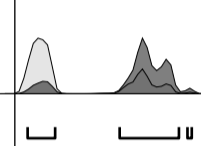

R\_Date CRL19212

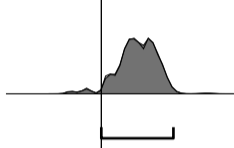

R\_Date CRL19213

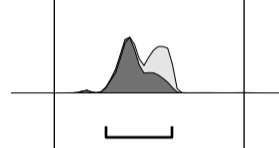

R\_Date CRL19214

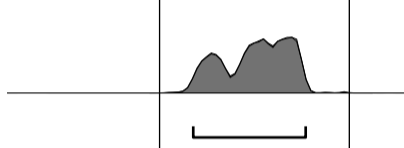

R\_Date CRL19215

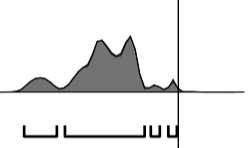

R\_Date CRL19217

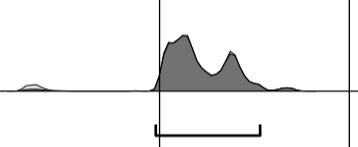

R\_Date CRL19280

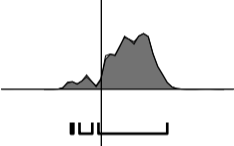

R\_Date CRL19787

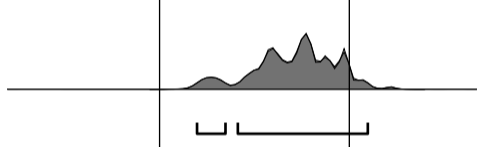

R\_Date CRL19788

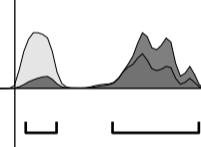

R\_Date CRL19789

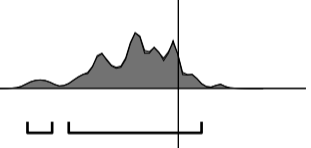

R\_Date CRL19790

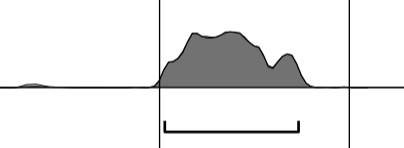

R\_Date CRL19793

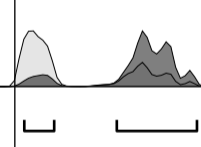

R\_Date CRL19925

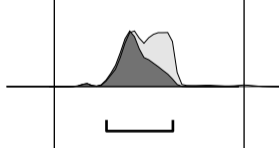

R\_Date CRL19926

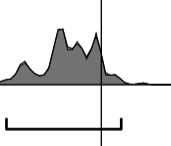

R\_Date CRL19928

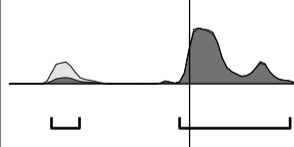

R\_Date CRL19929

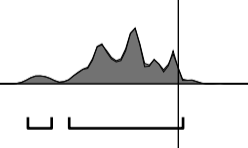

R\_Date CRL19930

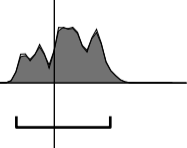

R\_Date CRL19931

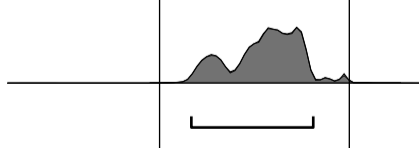

R\_Date CRL19932

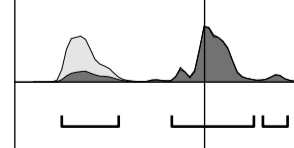

R\_Date CRL19933

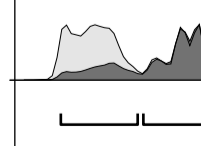

R\_Date CRL19934

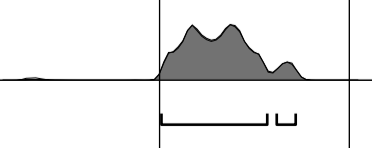

Boundary Trilith Activity End

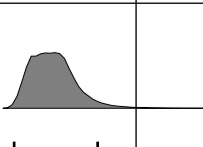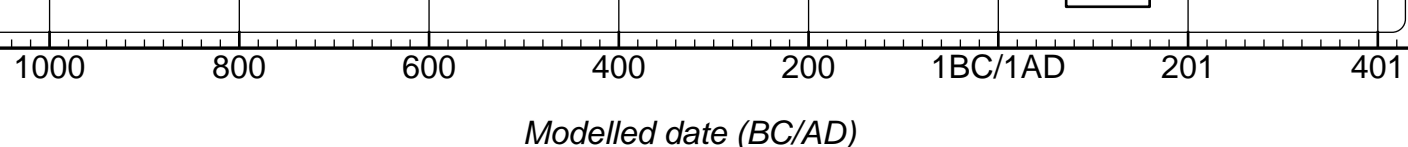

Supplement: Supplementary file 1 [file S003382222000123Xsupp002.pdf]
